# Supplementary material for: Increasing Sodium-Glucose Cotransporter 2 Inhibitor Use in CKD: Perspectives and Presentation of a Clinical Pathway
Source: PubMed Central journal article supplement — Kidney Med. 2022 Mar 12;4(5):100446. doi: 10.1016/j.xkme.2022.100446 (PMC9052139; doi:10.1016/j.xkme.2022.100446), 2022-03-12
Supplement: mmc1.pdf [file mmc1.pdf]

## **Item S1. SGLT2 Inhibitors Background and Evidence Review**

### **Additional Background**

Chronic kidney disease (CKD) is a major national public health concern affecting approximately 37 million adults in the United States<sup>1</sup> and is the 10th leading cause of death, predominately due to cardiovascular disease.<sup>2,3</sup> Pharmacotherapy to reduce cardio-renal risk remains imperative. Despite strong evidence in randomized controlled trials of the benefits of SGLT2i therapy, there is considerable underutilization of SGLT2i in patients with CKD.<sup>4,5</sup> There is an unmet need for an effective and timely evidence-based tool to support the implementation of this impactful therapy. A clinical pathway, in conjunction with other support strategies such as electronic medical record resources, has been shown to be an effective method of research translation to overcome clinical inertia.<sup>6,7</sup> Here, we review the evidence surrounding SGLT2i and present a clinical pathway that can be used by nephrologists, nephrology advanced practice providers (APPs), and other clinicians to aid in prescribing SGLT2i therapy for patients with CKD.

### **SGLT2i Background and Brief Evidence Review**

Sodium-glucose cotransporter-2 (SGLT2) is expressed in the proximal tubule of the kidney and is responsible for the active transport of glucose across the cell membrane, which reabsorbs approximately 90% of the filtered glucose.<sup>8</sup> SGLT2 inhibition decreases the kidney glucose threshold, which results in glycosuria, a reduction in plasma glucose, and an osmotic diuresis with increased urine output.<sup>9,10</sup> There is an accompanying natriuresis, which leads to afferent arteriolar vasoconstriction via tubuloglomerular feedback.<sup>10</sup> The downstream effect is a decrease in intraglomerular pressure, which is thought to reduce kidney function decline over time.<sup>10</sup>

Pharmacotherapy to block SGLT2 and promote glycemic control in type 2 diabetes

received FDA approval in 2013.<sup>11</sup> The first SGLT2i approved was canagliflozin, followed by empagliflozin, dapagliflozin, and most recently ertugliflozin.<sup>11</sup> Subsequent to the indication for glucose reduction, several large cardiovascular outcome trials (CVOTs) demonstrated significant cardiovascular benefits of SGLT2i in patients with type 2 diabetes.<sup>12-14</sup> EMPA-REG OUTCOME (Empagliflozin, Cardiovascular Outcomes, and Mortality in Type 2 Diabetes) and CANVAS Programs (Canagliflozin and Cardiovascular and Renal Events in Type 2 Diabetes) both saw a 14% relative risk reduction with SGLT2i use as compared to placebo in major adverse cardiovascular endpoints (MACE), defined by the composite of death from cardiovascular disease, non-fatal myocardial infarction, or non-fatal stroke.<sup>12,13</sup> While DECLARE-TIMI 58 (Dapagliflozin Effect on Cardiovascular Events) did not demonstrate the same benefits for MACE, there was a 17% relative risk reduction in cardiovascular death or hospitalization for heart failure with SGLT2i use as compared to placebo, an effect that was consistent across all levels of renal function and albuminuria status.<sup>14,15</sup>

In patients with heart failure with reduced and preserved ejection fraction, several studies showed similar benefit.<sup>16-18</sup> Specifically, in heart failure with reduced ejection fraction, DAPA-HF (Dapagliflozin in Patients with Heart Failure with Reduced Ejection Fraction) and EMPEROR-Reduced (Cardiovascular and Renal Outcomes with Empagliflozin in Heart Failure) demonstrated a 26% and 22% risk reduction respectively for the composite of heart failure hospitalization or cardiovascular death with SGLT2i as compared to placebo.<sup>16,17</sup> Similarly, in patients who had heart failure with preserved ejection fraction, EMPEROR-Preserved (Empagliflozin in Heart Failure with a Preserved Ejection Fraction) demonstrated a 21% reduced risk.<sup>18</sup> The trials enrolled patients with CKD (eGFR  $\geq$  30 ml/min/1.73m<sup>2</sup> for DAPA-HF and  $\geq$ 20 ml/min/1.73m<sup>2</sup> for EMPEROR-Reduced and EMPEROR-Preserved) and results were similar regardless of diabetes and severity of CKD.<sup>18-21</sup> Overall, these trials showed a consistent benefit of SGLT2i in heart

failure management which led to varying new indications to reduce the risk of hospitalization for heart failure and cardiovascular death.<sup>11</sup>

The secondary analyses of the CVOTs that focused on adverse kidney outcomes provided strong evidence of kidney protection from the SGLT2i in patients with CKD.<sup>13,20-27</sup> In EMPA-REG OUTCOME, empagliflozin as compared to placebo conferred a 39% relative risk reduction for secondary composite endpoint of urine albumin/creatinine >300 mg/g, doubling of creatinine with an eGFR of  $\leq 45$  ml/min/1.73m<sup>2</sup>, incident end-stage kidney disease (ESKD), or kidney related death, with no difference in results between those with and without CKD.<sup>20</sup> Importantly, there was a 55% relative risk reduction for progression to ESKD with the use of empagliflozin as compared to placebo.<sup>20</sup> CANVAS Program produced similar results for these secondary composite outcomes.<sup>13,21</sup> Each study saw an initial decrease in eGFR in both arms, which then stabilized in the treated group and declined in the placebo group. Overall, there was an annual eGFR decline of 0.19 and 0.33 ml/min/1.73m<sup>2</sup> in the treated arm as compared to 1.67 and 0.85 ml/min/1.73m<sup>2</sup> in the placebo group for EMPA-REG OUTCOME and CANVAS Program respectively.<sup>20,21</sup> Subsequent analyses demonstrated that these findings were similar for subjects with CKD across a spectrum of eGFR.<sup>21,23</sup> Notably, over 80% of subjects in both studies were on renin-angiotensin receptor (RAS) blockers, and these findings were similar regardless of the presence of RAS blockade.<sup>12,13,</sup>

<sup>21,23</sup>

CREDENCE (Canagliflozin and Renal Outcomes in Type 2 Diabetes and Nephropathy) was the first trial to assess kidney outcomes in a CKD population with type 2 diabetes at high risk for CKD progression.<sup>24</sup> CREDENCE showed that SGLT2i use as compared to placebo conferred a 30% and 34% relative risk reduction in the primary composite outcome (serum creatinine doubling, ESKD, or death due to kidney or cardiovascular cause) and secondary endpoints (composite of ESKD, serum creatinine doubling, or death due to kidney causes), respectively.<sup>24</sup>

Further analysis revealed that the beneficial kidney effects of SGLT2i seen in CREDENCE and other trials were consistent across strata of eGFR and albuminuria status.<sup>25,26</sup> Additionally, SGLT2i use blunted the slope of eGFR decline over time, similar to the analyses in the CVOTs.<sup>17,18,22,25,26</sup> The evidence from CREDENCE led to a new FDA indication of canagliflozin for the treatment of diabetic kidney disease in 2019, the first medication to gain such approval in approximately 20 years.<sup>11</sup>

While the prior trials focused on patients with type 2 DM, questions remained as to whether the beneficial effects extended to patients without DM, particularly given the DAPA-HF results that showed similar efficacy of dapagliflozin in patients with and without DM. Likewise, EMPEROR-Reduced and EMPEROR-Preserved saw preservation of the eGFR slope with SGLT2i use in patients with CKD with and without diabetes.<sup>17-19</sup> DAPA-CKD (Dapagliflozin in Patients with Chronic Kidney Disease), which enrolled patients with and without type 2 DM, demonstrated that dapagliflozin as compared to placebo reduced the primary endpoint (a composite of a sustained decline in the eGFR of  $\geq 50\%$ , ESKD, or death from kidney or cardiovascular causes) by approximately 40%.<sup>27</sup> The results were similar regardless of diabetes status. As a result of the DAPA-CKD findings, dapagliflozin gained an FDA indication in 2020 for treatment of CKD (specifically reduction of sustained eGFR decline, ESKD, hospitalization for heart failure, and cardiovascular death) irrespective of diabetes or albuminuria status for those who are at risk of progression.<sup>28</sup> Based on the benefits seen in the trials and the new FDA indications, the major clinical practice guidelines, including Kidney Disease Improving Global Outcomes (KDIGO), now overwhelmingly support the use of SGLT2i in patients with CKD and type 2 diabetes.<sup>29-31</sup>

### **Evidence Translation through Clinical Pathway**

The pathway in **Figure 1** reflects the most current evidence and indications, and it is intended to be dynamic to account for additional trial data that is expected to emerge. It is

suggested to use this pathway in print and/or electronic form in the clinical setting and is designed for use by both specialty and primary care providers. In our academic nephrology practice, the pathway is displayed as laminated cards in visible locations in exam rooms. As additional support, the pathway has been extrapolated into a best practice alert in the electronic medical record. This best practice alert “triggers” on appropriate patients during an office visit and serves as a prompt for the provider to consider SGLT2i therapy in patients meeting appropriate criteria. Mirroring the pathway, this alert contains a systematic process for SGLT2i initiation and monitoring. Further details on operationalizing this pathway through a quality improvement project at our institution are forthcoming and will be reported on in a future paper. Of fundamental importance, clinical-behavioral change is complex, and utilization of the pathway should be supported with peer-peer discussions and provider buy-in.

### **Additional Side Effects**

The CANVAS trial saw an increase in fracture and amputation with the use of SGLT2i in patients with normal and reduced kidney function, which raised early concerns over their use in patients with a history of foot/lower limb ulceration or peripheral arterial disease.<sup>13</sup> Subsequent trials and post-marketing surveillance did not identify an increased fracture and amputation risk in patients on SGLT2i and cited peripheral arterial disease as the most important predictor of amputation.<sup>24,25,32</sup> The pathway advises to avoid SGLT2i use with critical limb ischemia and to monitor for foot/lower limb ulceration with annual (or more frequent) exams and to hold SGLT2i with any concerning findings.

### **Cost**

Cost is an important barrier to SGLT2i use and requires attention when operationalizing the clinical pathway. Out-of-pocket expenses for these medications can be high, with a reported list price for dapagliflozin of approximately \$530/month without insurance coverage.<sup>33</sup> Medicare part

D coverage varies depending on prior payments in the year but are generally high at over \$1000 annually.<sup>34</sup> Despite high individual costs, however, several cost analyses on kidney and cardiovascular outcomes found that the SGLT2i were cost-effective at an individual and societal level.<sup>35-38</sup> Of particular interest to nephrologists, one study showed that the two year delay of dialysis conferred by dapagliflozin use could result in a \$30,000,000 per 5,000 patients cost reduction over a ten year period.<sup>39</sup> High and shifting costs will affect prescribing uptake. Discussion of SGLT2i with patients should include cost and can be aided with pharmacy involvement and various voucher programs.

## REFERENCES

1. Centers for Disease Control and Prevention. *Chronic Kidney Disease in the United States, 2021*. US Department of Health and Human Services, Centers for Disease Control and Prevention. <https://www.cdc.gov/kidneydisease/publications-resources/2019-national-facts.html>
2. Ahmad FB, Cisewski JA, Miniño A, Anderson RN. Provisional mortality data-United States, 2020. *MMWR Morb and Mortal Wkly Rep*. 2021;70(14):519-522. doi:10.15585/mmwr.mm7014e1
3. Virani SS, Alonso A, Benjamin EJ, et al. Heart disease and stroke statistics-2020 Update: a report from the American Heart Association. *Circulation*. 2020;141(9):e139-e596. doi:10.1161/CIR.0000000000000757
4. Hamid A, Vaduganathan M, Oshunbade AA, et al. Antihyperglycemic therapies with expansions of US Food and Drug Administration indications to reduce cardiovascular events: prescribing patterns within an academic medical center. *J Cardiovasc Pharmacol*. 2020;76:313-20. doi: 10.1097/FJC.0000000000000864
5. Vaduganathan M, Sathiyakumar V, Singh A, et al. Prescriber patterns of SGLT2i after expansions of U.S. Food and Drug Administration labeling. *J Am Coll Cardiol*. 2018;72(25):3370-3372. doi: 10.1016/j.jacc.2018.08.2202.
6. Greenhalgh, T. *How to Implement Evidenced Based Health Care*. Wiley-Blackwell; 2017.
7. White KM, Dudley-Brown S, Terhaar MF. *Translation of Evidence into Nursing and Health Care*. Second edition. Springer Publishing Company, LLC; 2016.
8. Scheen AJ. Pharmacodynamics, efficacy and safety of sodium-glucose co-transporter type 2 (SGLT2) inhibitors for the treatment of type 2 diabetes mellitus. *Drugs*. 2015;75(1):33-59. doi: 10.1007/s40265-014-0337-y

9. Bailey CJ. Renal glucose reabsorption inhibitors to treat diabetes. *Trends Pharmacol Sci.* 2011;32(2):63-71. doi:10.1016/j.tips.2010.11.011
10. Verma, S, McMurray, JJV. SGLT2 inhibitors and mechanisms of cardiovascular benefit: a state-of-the-art review. *Diabetologia.* 2018;61:2108–2117. doi.org/10.1007/s00125-018-4670-7
11. U.S. Food and Drug Administration. Drug approvals and database. Updated September 23, 2021. Accessed Sept 25, 2021. <https://www.fda.gov/drugs/development-approval-process-drugs/drug-approvals-and-databases>
12. Zinman B, Wanner C, Lachin JM, et al. Empagliflozin, cardiovascular outcomes, and mortality in type 2 diabetes. *N Engl J Med.* 2015;373(22):2117-2128. doi:10.1056/NEJMoa1504720
13. Neal B, Perkovic V, Mahaffey KW, et al. Canagliflozin and cardiovascular and renal events in type 2 diabetes. *N Engl J Med.* 2017;377(7):644. doi.org/10.1056/NEJMoa1611925
14. Wiviott SD, Sabatine MS, Langkilde A-M, et al. Dapagliflozin and cardiovascular outcomes in type 2 diabetes. *N Engl J Med.* 2019;380(4):347. doi.org/10.1056/NEJMoa1812389
15. Zelniker TA, Raz I, Mosenzon O, et al. Effect of dapagliflozin on cardiovascular outcomes according to baseline kidney function and albuminuria status in patients with type 2 diabetes: a prespecified secondary analysis of a randomized clinical trial. *JAMA Cardiol.* 2021;6(7):801–810. doi:10.1001/jamacardio.2021.0660
16. McMurray JJV, Solomon SD, Inzucchi SE, et al. Dapagliflozin in patients with heart failure and reduced ejection fraction. *N Engl J Med.* 2019;381(21):1995-2008. doi.org/10.1056/NEJMoa1911303



17. Packer M, Anker SD, Butler J, et al. Cardiovascular and renal outcomes with empagliflozin in heart failure. *N Engl J Med*. 2020;383(15):1413. doi: 10.1056/NEJMoa2022190
18. Anker SD, Butler J, Filippatos G, et al. Empagliflozin in heart failure with a preserved ejection fraction. *N Engl J Med*. 2021;385(16):1451-1461. doi:10.1056/NEJMoa2107038
19. Zannad F, Ferreira JP, Pocock SJ, et al. Cardiac and kidney benefits of empagliflozin in heart failure across the spectrum of kidney function: insights From EMPEROR-Reduced. *Circulation*. 2021;143(4):310. doi:10.1161/CIRCULATIONAHA.120.051685
20. Wanner C, Inzucchi SE, Lachin JM, et al. Empagliflozin and progression of kidney disease in type 2 diabetes. *N Engl J Med*. 2016;375(4):323-334. doi:10.1056/NEJMoa1515920
21. Neuen BL, Ohkuma T, Neal B, et al. Cardiovascular and renal outcomes with canagliflozin according to baseline kidney function. *Circulation*. 2018;138(15):1537-1550. doi:10.1161/CIRCULATIONAHA.118.035901
22. Perkovic V, de Zeeuw D, Mahaffey KW, et al. Canagliflozin and renal outcomes in type 2 diabetes: results from the CANVAS Program randomised clinical trials. *Lancet Diabetes Endocrinol*. 2018;6(9):691-704. doi:10.1016/S2213-8587(18)30141-4
23. Wanner C, Lachin JM, Inzucchi SE, et al. Empagliflozin and clinical outcomes in patients with type 2 diabetes mellitus, established cardiovascular disease, and chronic kidney disease. *Circulation*. 2018;137(2):119-129. doi:10.1161/CIRCULATIONAHA.117.028268
24. Perkovic V, Jardine MJ, Neal B, et al. Canagliflozin and renal outcomes in type 2 diabetes and nephropathy. *N Engl J Med*. 2019;380(24):2295-2306. doi:10.1056/NEJMoa1811744
25. Toyama T, Neuen BL, Jun M, et al. Effect of SGLT2 inhibitors on cardiovascular, renal and safety outcomes in patients with type 2 diabetes mellitus and chronic kidney disease: a systematic review and meta-analysis. *Diabetes Obes Metab*. 2019;21(5):1237-1250. doi:10.1111/dom.13648

26. Neuen BL, Young T, Heerspink HJL, et al. SGLT2 inhibitors for the prevention of kidney failure in patients with type 2 diabetes: a systematic review and meta-analysis. *Lancet Diabetes Endocrinol*. 2019;7(11):845-854. doi:10.1016/S2213-8587(19)30256-6
27. Heerspink HJL, Stefansson BV, Correa-Rotter R, et al. Dapagliflozin in patients with chronic kidney disease. *N Engl J Med*. 2020;383(15):1436. doi: 10.1056/NEJMoa2024816.
28. FDA. FDA Approves Treatment for Kidney Disease. US Food and Drug Administration. April 30, 2021. Accessed July 1, 2021. <https://www.fda.gov/news-events/press-announcements/fda-approves-treatment-chronic-kidney-disease>
29. Buse JB, Wexler DJ, Tsapas A, et al. 2019 update to: management of hyperglycaemia in type 2 diabetes, 2018. A consensus report by the American Diabetes Association (ADA) and the European Association for the Study of Diabetes (EASD). *Diabetologia*. 2020;63(2):221. doi:10.1007/s00125-019-05039-w
30. Cosentino F, Grant PJ, Aboyans V, et al. 2019 ESC Guidelines on diabetes, pre-diabetes, and cardiovascular diseases developed in collaboration with the EASD: the Task Force for diabetes, pre-diabetes, and cardiovascular diseases of the European Society of Cardiology (ESC) and the European Association for the Study of Diabetes (EASD). *Eur Heart J*. 2020;41(2):255-323. doi.org/10.1093/eurheartj/ehz486
31. KDIGO 2020 Clinical practice guideline for diabetes management in chronic kidney disease. *Kidney Int*. 2020;98(4):S1-S115. doi:10.1016/j.kint.2020.06.019
32. Paul SJ, Bhatt DL, Montvida O, et al. The association of amputations and peripheral artery disease in patients with type 2 diabetes mellitus receiving sodium-glucose cotransporter type-2 inhibitors: real-world study. *Eur Heart J*. 2021;42(18):1728–1738. doi.org/10.1093/eurheartj/ehaa956

33. Farxiga. Savings and insurance support. <https://www.farxiga.com/savings-support/hero#costandafford>. Accessed October 1, 2021.
34. Luo J, Feldman R, Rothenberger SD, et al. Coverage, formulary restrictions, and out-of-pocket costs for sodium-glucose cotransporter 2 inhibitors and glucagon-like peptide 1 receptor agonists in the Medicare part D program. *JAMA Netw Open*. 2020;3(10):e2020969. doi:10.1001/jamanetworkopen.2020.20969
35. Hong D, Si L, Jiang M, et al. Cost effectiveness of sodium-glucose cotransporter-2 (SGLT2) inhibitors, glucagon-like peptide-1 (GLP-1) receptor agonists, and dipeptidyl peptidase-4 (DPP-4) inhibitors: a systematic review. *Pharmacoeconomics*. 2019;37(6):777-818. doi: 10.1007/s40273-019-00774-9
36. Kamstra R, Lafeuille M-H, Pilon D, et al. Economic modelling of costs associated with outcomes reported for type 2 diabetes mellitus (T2DM) patients in the CANVAS and EMPA-REG cardiovascular outcomes trials. *J Med Econ*. 22(3):280-287. doi:10.1080/13696998.2018.1562817
37. Manceur AM, Durkin M, Kharat A, et al. Costs associated with renal and cardiovascular events among patients with type 2 diabetes mellitus and nephropathy: a cost model based on the CREDENCE clinical trial. *Curr Med Res Opin*. 2020;36(4):563-570. doi:10.1080/03007995.2019.1708285
38. Isaza N, Calvachi P, Raber I, et al. Cost-effectiveness of dapagliflozin for the treatment of heart failure with reduced ejection fraction. *JAMA Netw Open*. 2021;4(7):e2114501. doi:10.1001/jamanetworkopen.2021.14501
39. Mcewan P, Darlington O, Wheeler D, et al. Cost-effectiveness of dapagliflozin as a treatment for chronic kidney disease: a health-economic analysis of Dapa-CKD. *Kidney Int Rep*. 2021;6(4):S145-S146. doi:10.1016/j.ekir.2021.03.351
